# Supplementary material for: Confirmatory Trials for Drugs Granted Conditional Approval by the Chinese National Medical Products Administration
Source: PubMed Central journal article supplement (PMC11681369; doi:10.1001/jamahealthforum.2024.4601), 2024-12-27
Supplement: jamahealthforum-e244601-s001.pdf [file jamahealthforum-e244601-s001.pdf]

## Data Sharing Statement

Tian. Confirmatory Trials for Drugs Granted Conditional Approval by the Chinese National Medical Products Administration. *JAMA Health Forum*. Published December 27, 2024.  
doi:10.1001/jamahealthforum.2024.4601

### Data

**Data available:** No
